# Supplementary material for: NMR-Guided Directed Evolution
Source: Research Square preprint supplement (doi:10.21203/rs.3.rs-1150236/v1), 2021-12-09
Supplement: Supplementary file 1 [file 127c512c5b40a97b5b08f9ce.docx]

Supplementary Table 1 | Sequences of the oligonucleotides used for megaprimer design and SOE-PCR for myoglobin (N: A, T, G, C; K: G, T; M: A, C)

| **Primers** | **Sequences** |
| --- | --- |
| NcoI_XhoI_F | TTATCCATGGTTCTGTCTGAAGGTGAATGGCAGCTGGTT |
| NcoI_XhoI_R | TTATCTCGAGTTAACCCTGGTAACCCAGTTCTTTGTATTTAGCAGCG |
| H64V_F | GAAGACCTGAAAAAA**GTG**GGTGTTACCGTT |
| H64V_R | AACGGTAACACC**CAC**TTTTTTCAGGTCTTC |
| W7NNK_F | TCTGAAGGTGAA**NNK**CAGCTGGTTCTG |
| V10NNK_F | CAGCTG**NNK**CTGCACGTTTGGGCTAAA |
| G25NNK_F | GGTCAC**NNK**CAGGACATCCTGATCCGT |
| Q26NNK_F | GCTGGTCACGGT**NNK**GACATCCTGATC |
| D27NNK_F | GGTCACGGTCAG**NNK**ATCCTGATCCGT |
| I28NNK_F | CACGGTCAGGAC**NNK**CTGATCCGTCTG |
| L29NNK_F | CACGGTCAGGACATC**NNK**ATCCGTCTG |
| L32NNK_F | ATCCTGATCCGT**NNK**TTCAAATCTCAC |
| F33NNK_F | ATCCTGATCCGTCTG**NNK**AAATCTCAC |
| T39NNK_F | TCTCACCCGGAA**NNK**CTGGAAAAATTC |
| K42NNK_F | CTGGAA**NNK**TTCGACCGTTTCAAACAC |
| F43NNK_F | ACCCTGGAAAAA**NNK**GACCGTTTCAAA |
| D44NNK_F | CTGGAAAAATTC**NNK**CGTTTCAAACAC |
| R45NNK_F | CTGGAAAAATTCGAC**NNK**TTCAAACAC |
| F46NNK_F | CTGGAAAAATTCGACCGT**NNK**AAACAC |
| K47NNK_F | CGTTTC**NNK**CACCTGAAAACCGAAGCT |
| E54NNK_F | ACCGAAGCT**NNK**ATGAAGGCTTCTGAA |
| K62NNK_F | GAAGACCTG**NNK**AAAGTGGGTGTTACC |
| H64NNK_F | GCTTCTGAAGACCTGAAAAAA**NNK**GGTGTTACC |
| V68NNK_F | GGTGTTACC**NNK**CTGACCGCTCTG |
| L69NNK_F | ACCGTT**NNK**ACCGCTCTGGGTGCTATC |
| A74NNK_F | GCTCTGGGT**NNK**ATCCTGAAGAAAAAG |
| L86NNK_F | CACCACGAAGCTGAA**NNK**AAACCGCTG |
| K87NNK_F | CACCACGAAGCTGAACTG**NNK**CCGCTG |
| A94NNK_F | CTGGCCCAGTCCCAC**NNK**ACCAAACAC |
| T95NNK_F | GCTCAGTCTCACGCT**NNK**AAACACAAAATCCCG |
| T95MNN_R | GATCGGGATTTTGTGTTT**MNN**AGCGTGAGACTGAGC |
| K96NNK_F | CAGTCTCACGCTACC**NNK**CACAAAATCCCGATC |
| K96MNN_R | GATCGGGATTTTGTG**MNN**GGTAGCGTGAGACTG |
| H97NNK_F | CACGCTACCAAA**NNK**AAAATCCCGATC |
| I101NNK_F | CACAAAATCCCG**NNK**AAATACCTGGAG |
| K102NNK_F | CACAAAATCCCGATC**NNK**TACCTGGAG |
| L104NNK_F | ATCAAATAC**NNK**GAGTTCATCTCTGAA |
| E105NNK_F | ATCAAATACCTG**NNK**TTCATCTCTGAA |
| F106NNK_F | ATCAAATACCTGGAG**NNK**ATCTCTGAA |
| I107NNK_F | TACCTGGAGTTC**NNK**TCTGAAGCTATC |
| S108NNK_F | CTGGAGTTCATC**NNK**GAAGCTATCATC |
| E109NNK_F | GAGTTCATCTCT**NNK**GCTATCATCCAC |
| A110NNK_F | TCTGAA**NNK**ATCATCCACGTTCTGCAC |
| I111NNK_F | ATCTCTGAAGCT**NNK**ATCCACGTTCTG |
| R118NNK_F | CTGCACTCT**NNK**CATCCGGGTAACTTC |
| Q128NNK_F | GCGGACGCT**NNK**GGTGCTATGAACAAA |
| L135NNK_F | AACAAAGCT**NNK**GAACTGTTCCGTAAA |
| F138NNK_F | CTGGAACTG**NNK**CGTAAAGACATCGCT |
| A143NNK_F | CTGTTCCGTAAAGACATC**NNK**GCTAAA |
| A144NNK_F | AAAGACATCGCT**NNK**AAATACAAAGAA |
| K145NNK_F | AAAGACATCGCTGCT**NNK**TACAAAGAA |
| G150NNK_F | GCTAAATACAAAGAACTG**NNK**TACCAG |
| Q152NNK_F | GAACTGGGTTAC**NNK**GGTTAACTCGAG |
| G153NNK_F | TACAAAGAACTGGGTTACCAG**NNK**TAA |

Supplementary Table 2 | Chemical shift values for residues of myoglobin H64V protein upon titration with 6-NBT as inhibitor

| Residue | Chemical Shift without 6-NBT, ppm | | Chemical Shift with two equivalents of 6-NBT, ppm | | 1H Chemical Shift Difference, ∆(𝝳H), ppm | 15N Chemical Shift Difference, ∆(𝝳N), ppm | Chemical shift perturbation, ∆𝝳, ppm | Z-score |
| --- | --- | --- | --- | --- | --- | --- | --- | --- |
| 1H Chemical Shift, 𝝳(1H), ppm | 15N Chemical Shift, 𝝳(15N), ppm | 1H Chemical Shift, 𝝳(1H), ppm | 15N Chemical Shift, 𝝳(15N), ppm |
| Leu2 | 8.473 | 127.263 | 8.425 | 127.170 | -0.0484 | -0.0928 | 0.0367 | 0.4371 |
| Ser3 | 9.162 | 117.806 | 9.154 | 117.768 | -0.0079 | -0.0377 | 0.0077 | -0.6972 |
| Glu4 | 9.159 | 121.370 | 9.155 | 121.386 | -0.0043 | 0.0155 | 0.0037 | -0.8530 |
| Gly5 | 8.675 | 106.272 | 8.674 | 106.284 | -0.0007 | 0.0117 | 0.0017 | -0.9323 |
| Glu6 | 7.801 | 123.014 | 7.806 | 123.025 | 0.0052 | 0.0106 | 0.0040 | -0.8443 |
| Trp7 | 8.528 | 119.040 | 8.530 | 119.100 | 0.0024 | 0.0597 | 0.0086 | -0.6624 |
| Gln8 | 8.457 | 116.603 | 8.469 | 116.598 | 0.0124 | -0.0048 | 0.0088 | -0.6552 |
| Leu9 | 7.557 | 119.930 | 7.569 | 119.934 | 0.0117 | 0.0042 | 0.0083 | -0.6748 |
| Val10 | 7.871 | 120.123 | 7.871 | 120.066 | 0.0002 | -0.0571 | 0.0081 | -0.6833 |
| Leu11 | 8.629 | 118.084 | 8.635 | 118.116 | 0.0056 | 0.0316 | 0.0060 | -0.7659 |
| His12 | 8.549 | 120.955 | 8.558 | 121.002 | 0.0091 | 0.0465 | 0.0092 | -0.6393 |
| Val13 | 7.754 | 118.410 | 7.790 | 118.472 | 0.0360 | 0.0622 | 0.0269 | 0.0560 |
| Trp14 | 8.869 | 122.293 | 8.890 | 122.216 | 0.0211 | -0.0774 | 0.0185 | -0.2745 |
| Ala15 | 7.592 | 118.002 | 7.532 | 117.920 | -0.0604 | -0.0818 | 0.0442 | 0.7349 |
| Lys16 | 7.083 | 115.660 | 7.116 | 115.671 | 0.0325 | 0.0111 | 0.0230 | -0.0969 |
| Val17 | 6.466 | 121.280 | 6.508 | 121.325 | 0.0417 | 0.0449 | 0.0302 | 0.1826 |
| Glu18 | 7.257 | 114.143 | 7.298 | 114.191 | 0.0409 | 0.0476 | 0.0297 | 0.1642 |
| Ala19 | 6.741 | 119.635 | 6.770 | 119.640 | 0.0289 | 0.0047 | 0.0204 | -0.1984 |
| Asp20 | 7.517 | 115.743 | 7.551 | 115.753 | 0.0335 | 0.0095 | 0.0237 | -0.0698 |
| Val21 | 8.721 | 130.105 | 8.746 | 130.119 | 0.0252 | 0.0136 | 0.0179 | -0.2973 |
| Ala22 | 8.504 | 121.699 | 8.528 | 121.845 | 0.0238 | 0.1460 | 0.0266 | 0.04438 |
| Gly23 | 8.040 | 105.883 | 8.081 | 105.979 | 0.0410 | 0.0960 | 0.0320 | 0.2551 |
| His24 | 7.623 | 117.035 | 7.668 | 117.112 | 0.0451 | 0.0772 | 0.0337 | 0.3216 |
| Gly25 | 8.722 | 108.234 | 8.788 | 108.375 | 0.0664 | 0.1414 | 0.0510 | 1.0009 |
| Gln26 | 7.956 | 120.220 | 7.988 | 120.283 | 0.0315 | 0.0627 | 0.0240 | -0.0600 |
| Asp27 | 7.848 | 117.019 | 7.864 | 117.001 | 0.0157 | -0.0177 | 0.0114 | -0.5538 |
| Ile28 | 8.624 | 120.501 | 8.708 | 120.534 | 0.0835 | 0.0334 | 0.0592 | 1.3223 |
| Leu29 | 8.100 | 119.259 | 8.202 | 119.445 | 0.1017 | 0.1863 | 0.0766 | 2.0028 |
| Ile30 | 8.573 | 116.866 | 8.619 | 116.917 | 0.0463 | 0.0509 | 0.0335 | 0.3143 |
| Arg31 | 7.950 | 118.603 | 7.947 | 118.541 | -0.0027 | -0.0625 | 0.0090 | -0.6455 |
| Leu32 | 8.515 | 123.379 | 8.422 | 123.139 | -0.0928 | -0.2399 | 0.0739 | 1.8963 |
| Phe33 | 8.847 | 117.370 | 8.874 | 117.392 | 0.0270 | 0.0217 | 0.0193 | -0.2418 |
| Lys34 | 8.784 | 117.421 | 8.803 | 117.385 | 0.0190 | -0.0364 | 0.0144 | -0.4359 |
| Ser35 | 8.331 | 113.660 | 8.347 | 113.623 | 0.0157 | -0.0368 | 0.0123 | -0.5193 |
| His36 | 8.470 | 117.700 | 8.487 | 117.710 | 0.0170 | 0.0096 | 0.0121 | -0.5257 |
| Pro37 |  |  |  |  |  |  |  |  |
| Glu38 |  |  |  |  |  |  |  |  |
| Thr39 | 8.791 | 113.511 | 8.776 | 113.503 | -0.0152 | -0.0077 | 0.0108 | -0.5764 |
| Leu40 | 7.685 | 123.280 | 7.657 | 123.251 | -0.0285 | -0.0286 | 0.0206 | -0.1941 |
| Glu41 | 7.340 | 113.256 | 7.302 | 113.232 | -0.0374 | -0.0231 | 0.0266 | 0.04475 |
| Lys42 | 7.476 | 113.250 | 7.389 | 113.087 | -0.0870 | -0.1635 | 0.0657 | 1.5767 |
| Phe43 | 7.811 | 121.027 | 7.831 | 121.088 | 0.0201 | 0.0605 | 0.0166 | -0.3496 |
| Asp44 | 8.220 | 122.032 | 8.205 | 122.001 | -0.0153 | -0.0309 | 0.0117 | -0.5425 |
| Arg45 | 8.863 | 114.088 | 8.753 | 114.026 | -0.1101 | -0.0625 | 0.0784 | 2.0720 |
| Phe46 | 7.623 | 112.748 | 7.531 | 112.619 | -0.0921 | -0.1289 | 0.0676 | 1.6515 |
| Lys47 | 7.720 | 117.495 | 7.777 | 117.542 | 0.0572 | 0.0467 | 0.0410 | 0.6068 |
| His48 |  |  |  |  |  |  |  |  |
| Leu49 | 7.543 | 123.280 | 7.521 | 123.249 | -0.0221 | -0.0306 | 0.0162 | -0.3642 |
| Lys50 | 8.741 | 119.152 | 8.728 | 119.110 | -0.0134 | -0.0418 | 0.0112 | -0.5621 |
| Thr51 | 7.941 | 108.383 | 7.930 | 108.369 | -0.0106 | -0.0139 | 0.0077 | -0.6962 |
| Glu52 |  |  |  |  |  |  |  |  |
| Ala53 | 8.533 | 120.373 | 8.519 | 120.382 | -0.0136 | 0.0086 | 0.0097 | -0.6200 |
| Glu54 | 7.897 | 118.037 | 7.892 | 117.996 | -0.0053 | -0.0409 | 0.0069 | -0.7298 |
| Met55 | 8.322 | 118.765 | 8.311 | 118.759 | -0.0111 | -0.0056 | 0.0079 | -0.6907 |
| Lys56 | 8.729 | 118.659 | 8.708 | 118.648 | -0.0214 | -0.0114 | 0.0152 | -0.4034 |
| Ala57 | 7.244 | 117.754 | 7.245 | 117.780 | 0.0007 | 0.0264 | 0.0038 | -0.8523 |
| Ser58 | 7.011 | 111.374 | 7.054 | 111.394 | 0.0431 | 0.0202 | 0.0306 | 0.2001 |
| Glu59 |  |  |  |  |  |  |  |  |
| Asp60 | 8.354 | 119.660 | 8.317 | 119.637 | -0.0371 | -0.0235 | 0.0264 | 0.0368 |
| Leu61 | 8.134 | 123.129 | 8.088 | 123.017 | -0.0457 | -0.1117 | 0.0360 | 0.4103 |
| Lys62 | 7.451 | 119.264 | 7.430 | 119.252 | -0.0212 | -0.0120 | 0.0151 | -0.4085 |
| Lys63 | 8.190 | 118.746 | 8.163 | 118.745 | -0.0271 | -0.0007 | 0.0192 | -0.2487 |
| Val64 | 8.569 | 122.354 | 8.493 | 122.433 | -0.0756 | 0.0792 | 0.0546 | 1.1414 |
| Gly65 | 8.906 | 108.224 | 8.882 | 108.244 | -0.0237 | 0.0195 | 0.0170 | -0.3341 |
| Val66 | 7.956 | 120.254 | 7.993 | 120.303 | 0.0370 | 0.0494 | 0.0271 | 0.0617 |
| Thr67 | 7.853 | 122.456 | 7.796 | 122.029 | -0.0569 | -0.4267 | 0.0725 | 1.8436 |
| Val68 | 8.229 | 125.175 | 8.145 | 125.010 | -0.0843 | -0.1648 | 0.0640 | 1.5094 |
| Leu69 |  |  |  |  |  |  |  |  |
| Thr70 |  |  |  |  |  |  |  |  |
| Ala71 |  |  |  |  |  |  |  |  |
| Leu72 |  |  |  |  |  |  |  |  |
| Gly73 | 7.909 | 106.331 | 7.949 | 106.332 | 0.0396 | 0.0011 | 0.0280 | 0.0979 |
| Ala74 | 6.931 | 121.066 | 6.936 | 121.048 | 0.0045 | -0.0177 | 0.0040 | -0.8413 |
| Ile75 | 6.990 | 117.049 | 6.975 | 117.001 | -0.0154 | -0.0482 | 0.0128 | -0.4963 |
| Leu76 | 8.378 | 122.074 | 8.370 | 122.142 | -0.0085 | 0.0684 | 0.0114 | -0.5535 |
| Lys77 | 7.548 | 113.386 | 7.516 | 113.381 | -0.0318 | -0.0048 | 0.0225 | -0.1180 |
| Lys78 | 7.241 | 114.656 | 7.242 | 114.687 | 0.0005 | 0.0307 | 0.0044 | -0.8292 |
| Lys79 | 7.847 | 119.998 | 7.860 | 119.991 | 0.0124 | -0.0073 | 0.0088 | -0.6538 |
| Gly80 | 9.212 | 106.052 | 9.194 | 105.992 | -0.0183 | -0.0598 | 0.0155 | -0.3939 |
| His81 | 7.321 | 123.537 | 7.311 | 123.482 | -0.0102 | -0.0546 | 0.0106 | -0.5857 |
| His82 | 6.896 | 114.472 | 6.879 | 114.497 | -0.0174 | 0.0253 | 0.0128 | -0.4976 |
| Glu83 | 8.732 | 124.113 | 8.690 | 124.124 | -0.0423 | 0.0107 | 0.0299 | 0.1742 |
| Ala84 | 8.779 | 118.660 | 8.721 | 118.738 | -0.0580 | 0.0777 | 0.0425 | 0.6647 |
| Glu85 | 8.480 | 118.378 | 8.497 | 118.370 | 0.0167 | -0.0073 | 0.0119 | -0.5352 |
| Leu86 | 8.893 | 118.660 | 8.814 | 118.385 | -0.0787 | -0.2746 | 0.0679 | 1.6606 |
| Lys87 | 8.265 | 118.980 | 8.219 | 118.867 | -0.0457 | -0.1135 | 0.0361 | 0.4147 |
| Pro88 |  |  |  |  |  |  |  |  |
| Leu89 |  |  |  |  |  |  |  |  |
| Ala90 |  |  |  |  |  |  |  |  |
| Gln91 |  |  |  |  |  |  |  |  |
| Ser92 |  |  |  |  |  |  |  |  |
| His93 | 8.027 | 123.371 | 7.942 | 123.249 | -0.0855 | -0.1223 | 0.0629 | 1.4655 |
| Ala94 | 7.780 | 122.681 | 7.849 | 122.618 | 0.0690 | -0.0632 | 0.0496 | 0.9448 |
| Tyr95 | 7.117 | 102.524 | 7.285 | 102.687 | 0.1681 | 0.1629 | 0.1211 | 3.7471 |
| Lys96 | 7.024 | 122.119 | 7.290 | 122.367 | 0.2655 | 0.2480 | 0.1910 | 6.4880 |
| His97 |  |  |  |  |  |  |  |  |
| Lys98 |  |  |  |  |  |  |  |  |
| Ile99 |  |  |  |  |  |  |  |  |
| Pro100 |  |  |  |  |  |  |  |  |
| Ile101 | 9.268 | 123.678 | 9.173 | 123.643 | -0.0946 | -0.0352 | 0.0671 | 1.6300 |
| Lys102 | 8.613 | 118.489 | 8.573 | 118.300 | -0.0402 | -0.1891 | 0.0390 | 0.5302 |
| Tyr103 | 9.578 | 121.366 | 9.548 | 121.382 | -0.0301 | 0.0163 | 0.0214 | -0.1606 |
| Leu104 | 7.954 | 118.620 | 8.015 | 118.762 | 0.0601 | 0.1424 | 0.0470 | 0.8438 |
| Glu105 | 8.236 | 125.175 | 8.145 | 125.011 | -0.0910 | -0.1639 | 0.0684 | 1.6816 |
| Phe106 | 8.098 | 119.179 | 8.058 | 119.010 | -0.0401 | -0.1689 | 0.0371 | 0.4536 |
| Ile107 | 8.831 | 119.738 | 8.888 | 119.735 | 0.0569 | -0.0035 | 0.0402 | 0.5776 |
| Ser108 | 7.632 | 120.687 | 7.702 | 120.769 | 0.0695 | 0.0822 | 0.0505 | 0.9800 |
| Glu109 | 7.764 | 120.541 | 7.826 | 120.659 | 0.0621 | 0.1179 | 0.0470 | 0.8416 |
| Ala110 | 7.779 | 122.637 | 7.849 | 122.623 | 0.0698 | -0.0137 | 0.0494 | 0.9366 |
| Ile111 | 8.428 | 118.126 | 8.522 | 118.188 | 0.0942 | 0.0620 | 0.0672 | 1.6341 |
| Ile112 | 7.698 | 118.143 | 7.757 | 118.169 | 0.0593 | 0.0257 | 0.0421 | 0.6501 |
| His113 | 8.297 | 117.998 | 8.352 | 118.087 | 0.0545 | 0.0890 | 0.0405 | 0.5895 |
| Val114 | 8.451 | 120.376 | 8.429 | 120.403 | -0.0225 | 0.0272 | 0.0164 | -0.3582 |
| Leu115 | 8.380 | 120.875 | 8.423 | 120.935 | 0.0428 | 0.0601 | 0.0314 | 0.2325 |
| His116 | 8.057 | 116.481 | 8.085 | 116.524 | 0.0282 | 0.0427 | 0.0208 | -0.1831 |
| Ser117 | 7.842 | 112.255 | 7.879 | 112.323 | 0.0373 | 0.0683 | 0.0281 | 0.1013 |
| Arg118 | 8.207 | 116.866 | 8.244 | 116.938 | 0.0368 | 0.0724 | 0.0280 | 0.09638 |
| His119 | 7.458 | 115.628 | 7.477 | 115.698 | 0.0185 | 0.0701 | 0.0164 | -0.3565 |
| Pro120 |  |  |  |  |  |  |  |  |
| Gly121 |  |  |  |  |  |  |  |  |
| Asn122 |  |  |  |  |  |  |  |  |
| Phe123 | 8.325 | 122.637 | 8.308 | 122.761 | -0.0167 | 0.1239 | 0.0211 | -0.1716 |
| Gly124 | 8.184 | 109.746 | 8.185 | 109.805 | 0.0013 | 0.0590 | 0.0084 | -0.6709 |
| Ala125 |  |  |  |  |  |  |  |  |
| Asp126 | 8.610 | 118.532 | 8.573 | 118.300 | -0.0375 | -0.2324 | 0.0422 | 0.6557 |
| Ala127 | 8.227 | 127.113 | 8.236 | 127.065 | 0.0089 | -0.0482 | 0.0093 | -0.6363 |
| Gln128 | 8.480 | 118.382 | 8.503 | 118.263 | 0.0222 | -0.1191 | 0.0230 | -0.0973 |
| Gly129 | 8.021 | 106.737 | 8.042 | 106.743 | 0.0211 | 0.0061 | 0.0149 | -0.4140 |
| Ala130 | 7.710 | 124.498 | 7.727 | 124.501 | 0.0174 | 0.0028 | 0.0123 | -0.5174 |
| Met131 | 8.442 | 116.780 | 8.450 | 116.749 | 0.0079 | -0.0306 | 0.0071 | -0.7229 |
| Asn132 | 8.591 | 117.370 | 8.601 | 117.432 | 0.0102 | 0.0615 | 0.0113 | -0.5570 |
| Lys133 | 7.961 | 120.168 | 7.988 | 120.283 | 0.0265 | 0.1147 | 0.0248 | -0.0283 |
| Ala134 | 8.325 | 122.637 | 8.308 | 122.760 | -0.0167 | 0.1233 | 0.0211 | -0.1743 |
| Leu135 | 8.282 | 116.096 | 8.279 | 116.034 | -0.0032 | -0.0613 | 0.0090 | -0.6487 |
| Glu136 | 8.292 | 122.890 | 8.308 | 122.756 | 0.0159 | -0.1336 | 0.0220 | -0.1380 |
| Leu137 | 8.220 | 122.032 | 8.205 | 122.001 | -0.0153 | -0.0309 | 0.0117 | -0.5425 |
| Phe138 | 7.671 | 118.494 | 7.654 | 118.411 | -0.0169 | -0.0831 | 0.0168 | -0.3429 |
| Arg139 | 8.282 | 116.417 | 8.255 | 116.153 | -0.0272 | -0.2639 | 0.0420 | 0.6461 |
| Lys140 | 8.827 | 121.866 | 8.766 | 121.872 | -0.0610 | 0.0056 | 0.0431 | 0.6914 |
| Asp141 | 8.540 | 122.374 | 8.480 | 122.411 | -0.0604 | 0.0367 | 0.0430 | 0.6868 |
| Ile142 | 8.568 | 123.258 | 8.586 | 123.437 | 0.0182 | 0.1794 | 0.0284 | 0.1154 |
| Ala143 | 8.421 | 123.400 | 8.395 | 122.988 | -0.0263 | -0.4120 | 0.0612 | 1.3980 |
| Ala144 | 7.866 | 120.776 | 7.839 | 120.736 | -0.0267 | -0.0404 | 0.0197 | -0.2266 |
| Lys145 | 7.825 | 119.558 | 7.824 | 119.753 | -0.0006 | 0.1945 | 0.0275 | 0.0786 |
| Tyr146 | 9.578 | 121.366 | 9.546 | 121.400 | -0.0316 | 0.0344 | 0.0229 | -0.1034 |
| Lys147 | 7.970 | 119.624 | 8.031 | 119.718 | 0.0605 | 0.0943 | 0.0448 | 0.7569 |
| Glu148 | 7.811 | 121.027 | 7.831 | 121.088 | 0.0201 | 0.0605 | 0.0166 | -0.3496 |
| Leu149 | 7.993 | 117.549 | 7.995 | 117.518 | 0.0017 | -0.0311 | 0.0046 | -0.8212 |
| Gly150 | 7.944 | 107.806 | 7.947 | 107.774 | 0.0030 | -0.0320 | 0.0050 | -0.8040 |
| Tyr151 | 8.146 | 121.626 | 8.158 | 121.610 | 0.0117 | -0.0159 | 0.0086 | -0.6639 |
| Gln152 | 8.324 | 126.246 | 8.331 | 125.997 | 0.0050 | -0.2495 | 0.0355 | 0.3904 |
| Gly153 | 6.016 | 111.977 | 6.124 | 112.157 | 0.1079 | 0.1798 | 0.0804 | 2.1532 |
